# Supplementary material for: Sex Differences in Neuropathy: The Paradigmatic Case of MetFormin
Source: MDPI journal article supplement (doi:10.3390/ijms232314503), 2022-11-22
Supplement: s1 [file s1]

# Sex differences in Neuropathy: the paradigmatic case of metformin

Federica De Angelis <sup>1,2</sup>, Valentina Vacca <sup>1,2</sup>, Jessica Tofanicchio <sup>3,†</sup>, Georgios Strimpakos <sup>1</sup>, Giacomo Giovazzo <sup>2</sup>, Flaminia Pavone <sup>1</sup>, Roberto Coccurello <sup>2,4,\*</sup> and Sara Marinelli <sup>1,\*</sup>

<sup>1</sup> National Research Council (CNR) Institute of Biochemistry and Cell Biology, Monterotondo (RM), Italy

<sup>2</sup> Sapienza University of Rome, Neurobiology student; Current address: SPA Società Prodotti Antibiotici S.p.A. Milan, Italy

<sup>3</sup> National Research Council (CNR) Institute for Complex System (ISC);

<sup>4</sup> European Center for Brain Research - IRCCS Santa Lucia Foundation, Rome Italy

\* Correspondence: RC roberto.coccurello@cnr.it (R.C.); sara.marinelli@cnr.it (S.M.)

Supplementary materials

Supplementary Figure S1

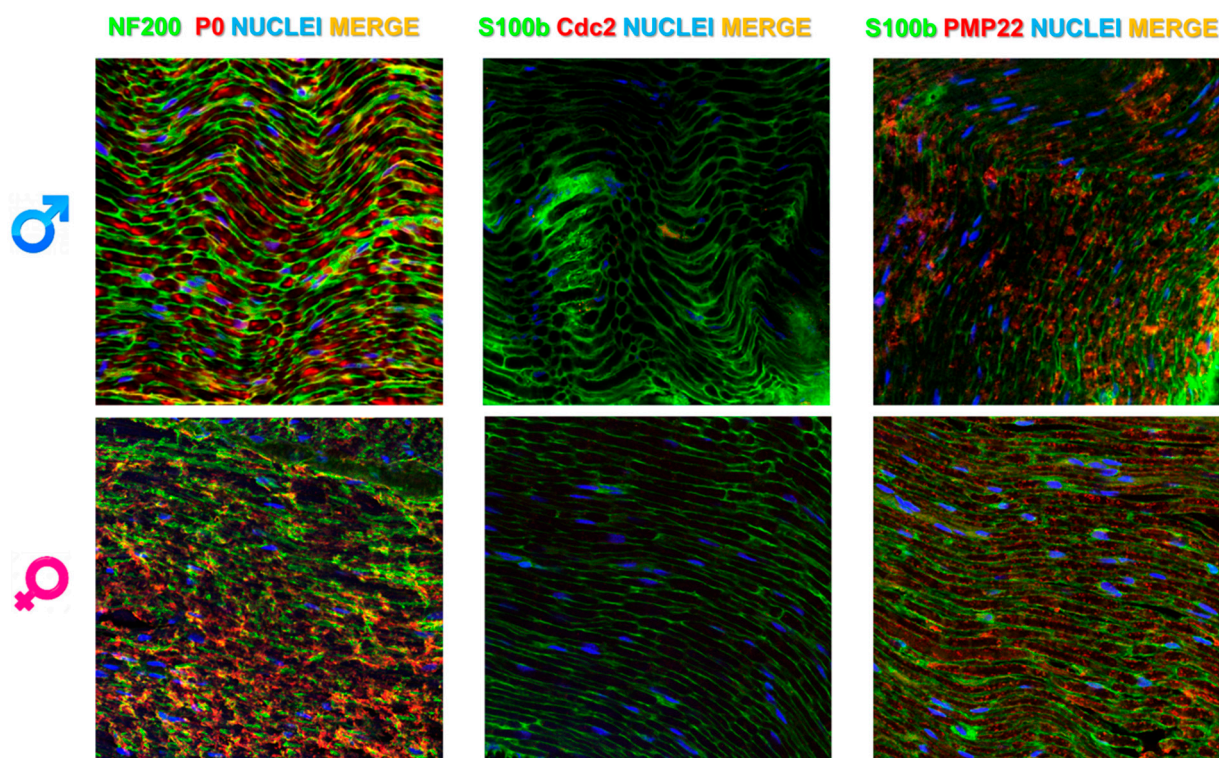

**Supplementary Figure S1-** Expression of neurofilament (NF200), myelin protein 0 (P0), S100beta, Cyclin-dependent kinase 1 (Cdc2), peripheral myelin protein 22 (PMP22) in sciatic nerve of male and female naïve mice.
